# Supplementary material for: Deletion of Wild-type p53 Facilitates Bone Metastatic Function by Blocking the AIP4 Mediated Ligand-Induced Degradation of CXCR4
Source: PubMed Central journal article supplement (PMC8844016; doi:10.3389/fphar.2021.792293), 2022-02-01
Supplement: Table1.pdf [file Table1.pdf]

**Table S1.** Clinicopathological characteristics of PCa patients

---

| <b>Characteristics</b>    |           | <b>Total (46)</b> |
|---------------------------|-----------|-------------------|
| Age (years)               | $\leq 73$ | 22                |
|                           | $> 73$    | 24                |
| Total PSA (ng/ml)         | $\leq 10$ | 17                |
|                           | $> 10$    | 29                |
| Gleason score             | $\leq 7$  | 19                |
|                           | $> 7$     | 27                |
| T stage                   | T2        | 30                |
|                           | T3-4      | 16                |
| N stage                   | N0        | 32                |
|                           | N1        | 14                |
| Relapse/Metastasis status | Negative  | 35                |
|                           | Positive  | 11                |

---
