# Supplementary material for: Deletion of Wild-type p53 Facilitates Bone Metastatic Function by Blocking the AIP4 Mediated Ligand-Induced Degradation of CXCR4
Source: PubMed Central journal article supplement (PMC8844016; doi:10.3389/fphar.2021.792293), 2022-02-01
Supplement: Table2.pdf [file Table2.pdf]

Table S2. The sequences of the *AIP4* promoter and the mutants driving the luciferase promoter.

| Name     | Location                                          | Sequence                                                                                                                                                                                                                                                                                                                                                                                                                                                                                                                                                                                                                                                                                                                                                                                                                                                                                                                                                                                                                                                                                                                                                  |
|----------|---------------------------------------------------|-----------------------------------------------------------------------------------------------------------------------------------------------------------------------------------------------------------------------------------------------------------------------------------------------------------------------------------------------------------------------------------------------------------------------------------------------------------------------------------------------------------------------------------------------------------------------------------------------------------------------------------------------------------------------------------------------------------------------------------------------------------------------------------------------------------------------------------------------------------------------------------------------------------------------------------------------------------------------------------------------------------------------------------------------------------------------------------------------------------------------------------------------------------|
| Wildtype | hg38_dna<br>range=chr20:<br>34362774-34<br>363773 | GGCCGCCGCCCTCACAGGGCCACGTCGCCCGCG<br>CCGGCCCCGCCGCCGGGCCCGCGCGTAGGCCGA<br>ACCGCTGGAGAGTGGCCCCAGGCGGGGCTGAGG<br>GGCGAGGGGCCGGACGGTACCCACGCCCGTCGT<br>GGCCAGCCCTTTCACAACTTGGAGCCCGCGAGG<br>CGAAGGCCTCCGGAAGCCTGTGCCAGACACTGAT<br>CCCTCCGAACGTCCAGACAGCCCACCCCCACCGC<br>CCGGCCCCGGGCCAGTAGCCCGAGCTCCCCGCGCC<br>CCCGACAGACACCGGCTCTGGAAGAAGGAGCAG<br>CCGCGGCTCTGGGGTCCCGAACCGCGCGTCCCAC<br>TCCTTACCCTTGTTCTCCCCGAACATTCTCATCC<br>GGACTCCCTCCCTCTCCCGAGAAGTGCCTCGAGT<br>TCGCCCACGGGGGTTTACCGGGACTCGGGGCGGC<br>GGCGACTCCTCAGTCCCTAGACTAAGATGGCAGC<br>CGGTCCCGAGCCCCGACCACAGCTACTAGAGCGA<br>GTTAGCAGCTAAAGCGCAGGCGCCTGAGCGCGG<br>AAGTGGTCTAGACTACAAGCCCCAGCAGG CCTTG<br>CGCGCCAGCCGTCCGGCCCCGCCCTGGCTTGAAG<br>AGCTGGCTGCGGTGGTAAATCAGTTAAATCCCAG<br>TTTTCCCTCAGCTCCAGGTGAGATGGGCGCGAGCG<br>GCTCCCAGCACCTCCAGGCTTTTTTTTTTTTTTAA<br>CACCCCGCCCACCAGAGCCTATAAGGACTGTGAT<br>TCTCAAACCTATGGTGTGCATCAGAATCACCTAGAG<br>AGCTTATTAACCTTACACTGCTGACCCCCACCCC<br>CAGAGTTTCTGATCAGAAGATCTGGCATAGGAGG<br>ATAGGGTCTGATAATTTGCATGTCCAACAAGCTGT<br>CTAGTGATACTGCTAGTGAGTGAAATCATAATTTG<br>AGAACCAATGGGCTATATAGCTTAGTTTATAACTTA<br>GTTGTTCTTTTTCTTTTTCTTTTCCTTTTCTTTTT<br>TTTCTTC |
| Mutant   | hg38_dna<br>range=chr20:<br>34362774-34<br>363773 | GGCCGCCGCCCTCACAGGGCCACGTCGCCCGCG<br>CCGGCCCCGCCGCCGGGCCCGCGCGTAGGCCGA<br>ACCGCTGGAGAGTGGCCCCAGGCGGGGCTGAGG<br>GGCGAGGGGCCGGACGGTACCCACGCCCGTCGT<br>GGCCAGCCCTTTCACAACTTGGAGCCCGCGAGG<br>CGAAGGCCTCCGGAAGCCTGTGCCAGACACTGAT<br>CCCTCCGAACGTCCAGACAGCCCACCCCCACCGC<br>CCGGCCCCGGGCCAGTAGCCCGAGCTCCCCGCGCC                                                                                                                                                                                                                                                                                                                                                                                                                                                                                                                                                                                                                                                                                                                                                                                                                                                  |

---

CCCGACAGACACCGGCTCTGGAAGAAGGAGCAG  
CCGCGGCTCTGGGGTCCCGAACCGCGCGTCCCAC  
TCCTCTACCCTTGTTCTCCCCGAACATTCTCATCC  
GGACTCCCTCCCTCTCCCGAGAACTGCCCGAGT  
TCGCCCACGGGGGTTTACCGGGACTCGGGGCGGC  
GGCGACTCCTCAGTCCCTAGACTAAGATGGCAGC  
CGGTCCCGAGCCCCGACCACAGCTACTAGAGCGA  
GTTAGCAGCTAAAGCGCAGGGCGCCTGAGCGCGG  
AAGTGGTCTAGACTGAGGTAAAAGTAGTTCCTTG  
CGCGCCAGCCGTCCGGCCCCGCCCTGGCTTGAAG  
AGCTGGCTGCGGTGGTAAATCAGTTAAATCCCAG  
TTTTCTCAGCTCCAGGTGAGATGGGCGCGAGCG  
GCTCCCAGCACCTCCAGGCTTTTTTTTTTTTTTAA  
CACCCCGCCCACCAGAGCCTATAAGGACTGTGAT  
TCTCAAACCTATGGTGTGCATCAGAATCACCTAGAG  
AGCTTATTAACCTTACACTGCTGACCCCCACCCC  
CAGAGTTTCTGATCAGAAGATCTGGCATAGGAGG  
ATAGGGTCTGATAATTTGCATGTCCAACAAGCTGT  
CTAGTGATACTGCTAGTGAGTGAAATCATAATTTG  
AGAACCAATGGGCTATATAGCTTAGTTTATAACTTA  
GTTGTTCTTTTTCTTTTTCTTTTCCTTTTCTTTTT  
TTTCTTC

---
